# Supplementary material
Source: MDPI journal article supplement (https://www.mdpi.com/1996-1073/17/10/2375)
Supplement: s1 [file s1]

# Supplementary Material

## Consumption-Based Energy Footprint Calculations

### Energy Footprint of Housing

Information about housing type, size, and heating source is collected through the survey and used to calculate the energy footprint of housing. If a household consists of more than one person, the energy consumption of housing is divided by the household size using the consumption unit. In this context, a household comprises either a single individual or individuals who live together as a family or in a family-like situation. They share living spaces and financial resources, excluding roommates. Personal energy consumption of housing is the sum of energy consumed through heating and electricity, divided by the household size.

$$\text{Personal energy consumption of housing} = \frac{\text{Heating consumption} + \text{electricity consumption}}{\text{Consumption unit}}$$

### Heating and electricity

Information about housing type, decade of construction, heating and electricity sources, and size of home are collected in the survey and used to calculate the energy footprints of housing. Respondents answered questions about their primary heating mode and could also state whether they had a secondary heating mode. Seven possible answers were provided for heating modes: "District heating," "Heat pump," "Boiler," "Electricity," "Heat-storing fireplace," "Other," and "I don't know." Those who answered with "Other" and "I don't know" were given district heating values. In households where two heating methods are used, the primary heating method is calculated as 80% and the secondary heating method as 20% of the total heating.

### Energy consumption of housing

For Iceland, most people rely on district heating, with heat input from geothermal resources, as their primary heating source. Table S1 presents the kWh/m<sup>2</sup> values for district heating and electricity consumption other than heating based on housing types which were derived from measured energy consumption in households within the largest utility in Iceland, Veitur [1]. In cases where individuals selected other as their housing type, they were assigned the values corresponding to apartments.

**Table S1.** Energy consumption of district heating and electricity use in kWh/m<sup>2</sup>/year by housing type [1].

| Housing Type        | District Heating | Electricity (other than heating) | Unit                      |
|---------------------|------------------|----------------------------------|---------------------------|
| Apartment           | 283.9            | 31.5                             | kWh/m <sup>2</sup> / year |
| Row House           | 229.8            | 32.9                             | kWh/m <sup>2</sup> / year |
| Semi-detached House | 264.9            | 34.3                             | kWh/m <sup>2</sup> / year |
| Detached House      | 282.1            | 33.7                             | kWh/m <sup>2</sup> / year |
| Other               | 283.9            | 31.5                             | kWh/m <sup>2</sup> / year |

### Embedded energy consumption of district heating and electricity

The embedded energy in Table S2 for heating and electricity are derived from Karlsdottir et al., [2] and the electricity mix has been calculated as 71% hydropower and 29% geothermal [3].

**Table S2.** Embedded energy in kWh per kWh of district heating and electricity use in Iceland [2].

|                  | <b>Embedded energy</b> | <b>Transmission losses</b> | <b>Total embedded energy</b> | <b>Unit</b>                         |
|------------------|------------------------|----------------------------|------------------------------|-------------------------------------|
| District Heating | 0.00039                | 0.000                      | 0.00039                      | kWh/kWh <sub>district heating</sub> |
| Electricity      | 0.01200                | 0.034                      | 0.04600                      | kWh/kWh <sub>electricity</sub>      |

### Energy consumption of other heating modes

For other heating modes, the energy consumption per m<sup>2</sup> is determined based on the building's type and the decade of its construction, as specified in Vimpari [4]. The specific values employed are listed in Table S3. Detached house values are used in calculations for both detached and semi-detached houses. When a participant selects other as their housing type, the values associated with apartments are applied.

**Table S3.** Energy consumption per m<sup>2</sup> (kWh/m<sup>2</sup>/year) by housing type [4].

| <b>Year</b> | <b>Apartment</b> | <b>Row-house</b> | <b>Detached</b> | <b>Unit</b>              |
|-------------|------------------|------------------|-----------------|--------------------------|
| 1950        | 167              | 182              | 180             | kWh/m <sup>2</sup> /year |
| 1960        | 196              | 200              | 203             | kWh/m <sup>2</sup> /year |
| 1970        | 178              | 181              | 180             | kWh/m <sup>2</sup> /year |
| 1980        | 148              | 151              | 152             | kWh/m <sup>2</sup> /year |
| 1990        | 158              | 151              | 153             | kWh/m <sup>2</sup> /year |
| 2000        | 132              | 134              | 133             | kWh/m <sup>2</sup> /year |

The Cumulative Primary Energy Requirement (CER) for various heating methods (except for district heating) is determined using midpoint values in MJ/MJ of thermal output, as reported in Cherubini et al., [5]. To calculate the energy consumption of heat pumps for heating, the MJ/MJ of electricity output is divided by 3, reflecting a coefficient of performance of 3 for heat pumps. Coefficients for all heating sources can be found in Table S4 as well as the coefficient for Icelandic electricity derived from Table S2.

**Table S4.** CER for heating sources other than district heating and for Icelandic district heating and electricity [2,5]

| <b>Heating source</b>              | <b>CER kWh/kWh<sub>th</sub></b> |
|------------------------------------|---------------------------------|
| District heating Iceland           | 1.00039                         |
| Oil                                | 1.25                            |
| Coal                               | 1.3                             |
| Natural gas                        | 1.2                             |
| Geothermal                         | 1.015                           |
| Heat storing fireplace             | 1.15                            |
| Fossil oil boiler                  | 1.25                            |
| Bio oil or firewood/pellets boiler | 1.15                            |
| Heat pumps                         | Electricity/3                   |
| Iceland electricity                | 1.046                           |

### Energy footprint of heating:

Energy consumption of heating for households with a single heating system:

$$\text{Energy consumption per } m^2_{\text{Housing type}} * \text{Size of home} * \text{CER of primary heating type}$$

Energy consumption of heating for households with a secondary heating system:

$$\text{Energy consumption per } m^2_{\text{Housing type}} * \text{Size of home} * (0.8 * \text{CER of primary heating type} + 0.2 * \text{CER of secondary heating type})$$

### Energy footprint of electricity use other than heating:

Energy consumption of electricity, other than for heating purposes, for households is calculated using electricity values from Table S2:

$$\text{Electricity consumption per } m^2_{\text{Housing type}} * \text{Size of home} * \text{CER of electricity}$$

### Total energy footprint of housing:

$$\frac{\text{Energy consumption of heating} + \text{energy consumption of electricity}}{\text{Consumption unit}}$$

To obtain the personal energy footprint of housing, the total energy footprint was divided by household size using the consumption unit.

## Energy footprint of vehicle possession and use

For the energy footprint of vehicle possession and use the production, maintenance and driven kilometers were used.

### Vehicle operation

For the operation, the reported annual driven kilometers for each reported vehicle, the type of fuel and reported fuel efficiency of the vehicle were utilized to determine the annual fuel consumption of the vehicle. The survey included the option to sometimes use alternative fuel (typically flexifuel cars and gas cars in which fossil gasoline can be utilized as well). In such cases, the secondary fuel contributes to 5%, 15%, 25%, 35%, or 45% of the total fuel intensity based on the choice of the survey respondent.

To determine the total annual fuel consumption, the survey respondents were requested to provide fuel efficiency information for each vehicle they reported, excluding EVs, for which an average value of 16.7 kWh/km from Dillman et al., [6] was used. However, in some cases, respondents replied with 'I don't know.' In these instances, the average fuel consumption per 100 km was assigned based on the fuel type and car model, using data derived from other survey responses.

### Direct energy of fuel use

Information about the energy content in different types of fuel was derived from a report by the Icelandic Ministry of Tourism - Industry and Innovation [7] and can be seen in Table S5.

**Table S5.** Energy content in kWh per unit of fuel [7]

| <b>Fuel</b>                                  | <b>Energy content</b> | <b>Unit</b> |
|----------------------------------------------|-----------------------|-------------|
| Petrol                                       | 9.02750               | kWh/l       |
| Ethanol                                      | 5.86110               | kWh/l       |
| Diesel                                       | 9.94724               | kWh/l       |
| Biodiesel                                    | 8.95000               | kWh/l       |
| Biomethane / biogas (from renewable sources) | 13.90000              | kWh/kg      |
| Natural gas / fossil methane                 | 13.90000              | kWh/kg      |
| Electricity / Hydrogen                       | 1.00000               | kWh/kWh     |

*Direct energy consumption of fuel =*

$$Total\ fuel\ consumption\ per\ year * energy\ content\ per\ unit$$

### Embedded energy of fuel

The energy use from fuel production includes the stages from extracting or cultivating the primary energy source to processing, refining, transporting, and distributing. The energy consumption values are expressed in kWh/kWh<sub>final fuel</sub>, indicating the ratio of energy required to produce one unit of final energy output [8] and are presented in Table S6. For embedded energy of electricity production values from Table S2 are used.

**Table S6.** Ratio of energy required to produce one unit of final energy [8]

| <b>Fuel</b>                                  | <b>kWh/kWh<sub>final fuel</sub></b> |
|----------------------------------------------|-------------------------------------|
| Petrol                                       | 0.24                                |
| Ethanol                                      | 1.39                                |
| Diesel                                       | 0.26                                |
| Biodiesel                                    | 1.11                                |
| Biomethane / biogas (from renewable sources) | 0.89                                |
| Natural gas / fossil methane                 | 0.2                                 |

*Embedded energy consumption of fuel:*

$$Total\ fuel\ consumption\ per\ year * energy\ content\ per\ unit * kWh/kWh_{final\ fuel}$$

### Embedded energy of vehicle production and maintenance

Vehicle production and maintenance data were sourced from Chester and Horvath [9] for all Internal Combustion Engine Vehicles (ICEVs). All vehicle types, except for "Large car," were assigned a value of 0.16 kWh/km driven based on an analysis of conventional Sedans. "Large car" received a value of 0.22 kWh/km based on an analysis of an SUV by Chester and Horvath. For Electric Vehicles (EVs), a value of 0.18 kWh/km was obtained from Dillman et al., [6], using emissions data to establish a 'weight' representing the difference in environmental impact between EVs and ICEVs. This 'weight' was then applied to calculate the energy consumption value of 0.18 kWh/km for EVs. The total kilometres

travelled each year were then used to determine the energy consumption for vehicle production and maintenance.

*Total energy footprint of vehicle use :*

$$\frac{\text{Total direct energy of fuel} + \text{Total embedded energy of fuel} + \text{Total embedded energy for vehicle production and maintenance}}{\text{Consumption unit}}$$

If individuals owned more than 1 vehicle the values for each were calculated following the same methodology and then added together.

## Energy footprint of Food and Goods and services

The EXIOBASE 3 database [10] was used to calculate the energy footprints of Goods and services. Norwegian energy intensities were used as a proxy for Iceland as Iceland is not included in the database. The Classification of Individual Consumption According to Purpose (COICOP) consumption categories are utilized in the survey and matched with EXIOBASE3 database following a concordance matrix from Ottelin et al., [11]. Consumption category specific inflation coefficients [12] and price statistics [13] were utilized to adjust the intensities of various sectors from 2015 to 2020 euros and convert from basic prices to purchaser prices. This was done to align them with the Survey data. As a result, the energy footprint model is based on the economic structure of 2015, while taking into consideration the consumption behavior observed in 2020. The currency exchange rates used are from the same year, 2020, where ISK/EUR=154.59 [14].

The energy footprint was then calculated by multiplying the estimated expenditure (EUR) by the corresponding energy intensity factor (kWh/EUR). Intensities for different categories of goods and services are presented in Table S7.

**Table S7.** Energy intensities in kWh/EUR from EXIOBASE3 [10] for different consumption categories

| <b>Consumption category</b>    | <b>kWh/EUR</b> |
|--------------------------------|----------------|
| Alcohol & Cigarettes           | 0.972          |
| Clothing & Footwear            | 1.373          |
| Interior Design & Housekeeping | 1.141          |
| Health                         | 0.316          |
| Recreation & Culture           | 0.560          |
| Restaurants                    | 0.647          |
| Hotels                         | 0.647          |
| Electronics                    | 1.33           |
| Other Goods & Services         | 0.506          |

The Energy Footprint of Goods and services was calculated by multiplying the energy intensity of each consumption category with the stated individual expenditure in that corresponding category. They were then added together to form the consumption domain of Goods and services.

## Energy intensities of different types of food

The Energy Footprint of Food was calculated the same as Goods and Services, by multiplying the energy intensity of Groceries with the stated individual expenditure in that category. To determine the weight of each food category, EXIOBASE3 was used [10] where Norwegian consumption was used as a proxy for Icelandic consumption, and energy intensities were taken from the Environmentally Extended Input-Output (EEIO) tables. For different diet types such as vegan, vegetarian, pescatarian, and omnivore, the calculations excluded food groups not aligned with those specific diets. The energy intensities used for different diet types can be seen in Table S8.

**Table S8.** Energy intensities in kWh/EUR obtained from EXIOBASE3 [10] for Food based on diet types.

| Diet        | kWh/EUR |
|-------------|---------|
| Omnivore    | 0.967   |
| Pescatarian | 0.999   |
| Vegetarian  | 0.923   |
| Vegan       | 0.923   |

The Energy Footprint of Food was calculated by multiplying the energy intensity of the stated diet with the stated individual expenditure in the consumption category of “Groceries”.

## Energy footprint of Public Transport

The information on the indirect energy from bus production and maintenance (0.036 kWh/km) was taken from Chester and Horvath [9] while the average occupancy rate of 23.44 passenger per kilometer for Icelandic buses taken from [15].

For direct energy consumption, information about various types of fueled buses and their fuel efficiency was extracted from Strætó's (Iceland's largest public transport provider) sustainability report [16]. Calculating the direct energy consumption involved factoring in the proportions of buses using diesel (86% of the fleet), methane (3.5% of the fleet), and electricity (10.5% of the fleet). This calculation utilized data from Table S5 and S6, and the results were appropriately weighted based on the fleet composition, resulting in a figure of 5.41 kWh/km per bus. The occupancy rate of 23.44 passenger per kilometer resulted in an energy consumption of 0.231 kWh/km per passenger. In the survey, participants were requested to provide an estimate of their average weekly travel distance using public transport. This information was subsequently utilized to calculate the total kilometers traveled per year.

*Total energy footprint of public transport :*

$$\begin{aligned} & \text{Total energy footprint of public transport} \\ &= (0.036 * \text{km traveled per year}) + (0.231 * \text{km traveled per year}) \end{aligned}$$

## Energy footprint of Leisure Travel

Energy consumption originating from the production of vehicles and infrastructure, fuel production, supply chain and direct energy consumption for bus travel is taken from Chester and Horvath [9] and for train travel from Chester [17]. Average occupancy rate of buses is taken from VTT Technical Research Centre of Finland [18]. Regarding airplanes, fuel efficiency values for flights under 800 km (0.077 l/PKT) and flights over 800 km (0.047 l/PKT) are taken from Amaas et al., [19] and are used to calculate the direct energy use from aviation fuel using greenhouse gas conversion factors published

by the UK Government [20]. Energy use related to vehicle and infrastructure production and maintenance along with fuel production, and supply chain is for planes is derived from Chester and Horvath [9]. For the direct energy use of ferries and fuel production, data is taken from Åkerman [21]. Energy embedded in vehicle production and maintenance of ferries is assumed to be the same as for planes. Values used to calculate the energy footprint of leisure travel can be seen in Table S9.

Energy use from leisure travel is calculated based on the travel distance and transport mode.

For short distant leisure travel, boat trips are calculated as 250km \* 2 (return). Airplane, train and bus are calculated as 500km \* 2 (return).

For medium distance leisure travel, boat trips are calculated as 1140km \* 2 (e.g. Helsinki to Travemunde and back). Airplane, train and bus are calculated as 2000km \* 2 (return).

For long distance leisure travel, boat trips are calculated as 6000km \* 2 (e.g. Southampton to New York and back). Airplane, train and bus are calculated as 8000km \* 2 (return).

**Table S9.** Energy use in kWh per passenger km traveled for different transport modes.

| Transport mode                                                             | Direct energy use (kWh/PKT) | Fuel production (kWh/PKT)                      | Vehicle production and maintenance (kWh/PKT) | Total kWh/PKT |
|----------------------------------------------------------------------------|-----------------------------|------------------------------------------------|----------------------------------------------|---------------|
| Plane <800 km                                                              | 0.79 [19].                  | Included in vehicle production and maintenance | 0.06 [9]                                     | 0.85          |
| Plane >800 km                                                              | 0.48 [19].                  | Included in vehicle production and maintenance | 0.06 [9]                                     | 0.54          |
| Ferry                                                                      | 0.6 [21]                    | 0.04 [21]                                      | 0.02 [9]                                     | 0.66          |
| Train: Caltrain and CAHSR [17]                                             | 0.21                        | Included in vehicle production and maintenance | 0.07                                         | 0.28          |
| Long distance bus (Chester and Horvath 2009) (occupancy rate 18 from [18]) | 0.31                        | Included in vehicle production and maintenance | 0.09                                         | 0.4           |

## Energy footprint of Second Homes

Respondents were asked if they possessed a second home with a yes/no question. They were then assigned energy consumption values based on Heinonen and Junnila [22]. Values are based on degree of urbanization and housing type and can be seen in Table S10. The value was then divided by the consumption unit. Those that responded with other in housing type were assigned apartment values and those that responded with semi-detached house were given detached house values. Rural values were given to respondents in semi-urban areas.

**Table S10.** Energy use of second home in kWh per household per year by degree of urbanization and housing type [22].

| Urban degree  | Urban        |               |               | Rural        |               |               | Unit         |
|---------------|--------------|---------------|---------------|--------------|---------------|---------------|--------------|
| Housing Type  | Detache<br>d | Row-hous<br>e | Apartme<br>nt | Detache<br>d | Row-ho<br>use | Apartme<br>nt |              |
| Per household | 1770         | 1270          | 1120          | 1560         | 1220          | 870           | kWh/yea<br>r |



## References

1. Veitur. Annual average energy consumption of district heating and electricity use of homes per m<sup>2</sup>. Personal Communication. **2023**.
2. Karlsdóttir, M.R.; Heinonen, J.; Palsson, H.; Palsson, O.P. Life cycle assessment of a geothermal combined heat and power plant based on high temperature utilization. *Geothermics* **2020**, *84*, 101727, doi:<https://doi.org/10.1016/j.geothermics.2019.101727>.
3. Orkustofnun. OS-2023-T002-01: Uppsett rafafi og raforkuframleiðsla í virkjunum á Íslandi 2022. Available online: <https://orkustofnun.is/upplýsingar/talnaefni/raforka> (accessed on 5 January 2024).
4. Vimpari, J. Should energy efficiency subsidies be tied into housing prices? *Environ. Res. Lett.* **2021**, *16*, doi:10.1088/1748-9326/abfeee.
5. Cherubini, F.; Bird, N.D.; Cowie, A.; Jungmeier, G.; Schlamadinger, B.; Woess-Gallasch, S. Energy- and greenhouse gas-based LCA of biofuel and bioenergy systems: Key issues, ranges and recommendations. *Resources, Conservation and Recycling* **2009**, *53*, 434-447, doi:<https://doi.org/10.1016/j.resconrec.2009.03.013>.
6. Dillman, K.J.; Árnadóttir, Á.; Heinonen, J.; Czepkiewicz, M.; Davíðsdóttir, B. Review and Meta-Analysis of EVs: Embodied Emissions and Environmental Breakeven. *Sustainability* **2020**, *12*, doi:10.3390/su12229390.
7. Ministry of Tourism - Industry and Innovation. *Skýrsla Ferðamála-, iðnaðar og nýsköpunarráðherra um innlenda eldseytisframleiðslu*; 2018.
8. Prussi, M.; Yugo, M.; De Prada, L.; Padella, M.; Edwards, R.; Lonza, L. *JEC well-to-tank report V5: JEC well-to-wheels analysis: well-to-wheels analysis of future automotive fuels and powertrains in the European context*; Publications Office of the European Union, Luxembourg, 2020.
9. Chester, M.V.; Horvath, A. Environmental assessment of passenger transportation should include infrastructure and supply chains. *Environmental Research Letters* **2009**, *4*, 024008, doi:10.1088/1748-9326/4/2/024008.
10. Stadler, K.; Wood, R.; Bulavskaya, T.; Södersten, C.-J.; Simas, M.; Schmidt, S.; Usubiaga, A.; Acosta-Fernández, J.; Kuenen, J.; Bruckner, M.; Giljum, S.; Lutter, S.; Merciai, S.; Schmidt, J. H.; Theurl, M. C.; Plutzar, C.; Kastner, T.; Eisenmenger, N.; Erb, K.-H.; ... Tukker, A. EX<sup>2</sup>BASE 3 (3.8.2) **2021**, doi:<https://doi.org/10.5281/zenodo.5589597>.
11. Ottelin, J.; Cetinay, H.; Behrens, P. Rebound effects may jeopardize the resource savings of circular consumption: evidence from household material footprints. *Environ. Res. Lett.* **2020**, *15*, doi:10.1088/1748-9326/abaa78.
12. Eurostat. Supply table at basic prices including transformation into purchasers' prices. Available online: (accessed on
13. Eurostat. Harmonised indices of consumer prices. Available online: (accessed on
14. European Central Bank. Statistics. ECB/Eurosystem policy and exchange rates. Euro foreign exchange reference rates. Available online: [https://www.ecb.europa.eu/stats/policy\\_and\\_exchange\\_rates/html/index.en.html](https://www.ecb.europa.eu/stats/policy_and_exchange_rates/html/index.en.html) (accessed on
15. Dillman, K.; Fazeli, R.; Czepkiewicz, M.; Heinonen, J.; Árnadóttir, Á. *Decarbonization Scenarios for Reykjavík's passenger transport: The combined effects of behavioral changes and technological developments: Sviðsmyndir í átt að kolefnishlutleysum ferðum innan höfuðborgarsvæðisins: Áhrif hegðunarbreytinga og tækniþróunar*; n.d.
16. Strætó. *2022 Sustainability Report*; 2022.
17. Chester, M.V. Life-cycle Environmental Inventory of Passenger Transportation in the United States. UC Berkeley, <https://escholarship.org/uc/item/7n29n303>, 2008.

18. VTT Technical Research Centre of Finland. LIPASTO unit emissions database. Available online: (accessed on 16 June 2021).
19. Aamaas, B.; Borken-Kleefeld, J.; Peters, G.P. The climate impact of travel behavior: A German case study with illustrative mitigation options. *Environmental Science & Policy* **2013**, *33*, 273-282, doi:10.1016/j.envsci.2013.06.009.
20. Department for Energy Security and Net Zero; Department for Business, E&S. *Greenhouse gas reporting: conversion factors 2020*; 2020.
21. Åkerman, J. Climate impact of international travel by Swedish residents. *Journal of Transport Geography* **2012**, *25*, 87-93, doi:https://doi.org/10.1016/j.jtrangeo.2012.07.011.
22. Heinonen, J.; Junnila, S. Residential energy consumption patterns and the overall housing energy requirements of urban and rural households in Finland. *Energy and Buildings* **2014**, *76*, 295-303, doi:https://doi.org/10.1016/j.enbuild.2014.02.079.
